# Supplementary material for: Wirksamkeit in Deutschland verfügbarer internetbasierter Interventionen für Depressionen – ein systematisches Review mit Metaanalyse
Source: Springer Nature journal article supplement (doi:10.1007/s00115-023-01587-0), 2024-01-23
Supplement: MOESM1 [file 26653616]

## Online-Zusatzmaterial zu

### Wirksamkeit von in Deutschland verfügbaren internetbasierten Interventionen für Depressionen - ein systematisches Review mit Metaanalyse

Efficacy of Internet-based Interventions for depression available in Germany - a systematic review and meta-analysis

Raoul Haaf<sup>1</sup>, Pia Vock<sup>2</sup>, Nikolaj Wächtershäuser<sup>2</sup>, Stephan Köhler<sup>1</sup>, Christoph U. Corell<sup>4-6</sup>, Jan Philipp Klein<sup>2,3</sup>

<sup>1</sup> *Klinik für Psychiatrie und Psychotherapie, Charité - Universitätsmedizin Berlin, Deutschland corporate member der Freien Universität Berlin and Humboldt- Universität zu Berlin, Berlin, Deutschland*

<sup>2</sup> *Klinik für Psychiatrie, Psychosomatik und Psychotherapie, Universität zu Lübeck, Lübeck, Deutschland*

<sup>3</sup> *Center for Brain, Behavior and Metabolism, Universität zu Lübeck, Lübeck, Deutschland*

<sup>4</sup> *Klinik für Kinder- und Jugendpsychiatrie, Charité - Universitätsmedizin Berlin, Berlin, Deutschland*

<sup>5</sup> *Department of Psychiatry, The Zucker Hillside Hospital, Northwell Health, Glen Oaks, NY, USA*

<sup>6</sup> *Department of Psychiatry and Molecular Medicine, Donald and Barbara Zucker School of Medicine at Hofstra/Northwell, Hempstead, NY, USA*

## 1 Appendix

### 1.1 eMethodenteil

#### 1.1.1 eTabelle 1: Übersicht über die Fragestellung der Studie gemäß PICO Schema

|                  |                                                                                                                                                                                                                                                                                                                                                                                                                                                                                                                                                                                                                                                                                                                                                                                                                                                                                                                                                                                                                                                                                                                  |
|------------------|------------------------------------------------------------------------------------------------------------------------------------------------------------------------------------------------------------------------------------------------------------------------------------------------------------------------------------------------------------------------------------------------------------------------------------------------------------------------------------------------------------------------------------------------------------------------------------------------------------------------------------------------------------------------------------------------------------------------------------------------------------------------------------------------------------------------------------------------------------------------------------------------------------------------------------------------------------------------------------------------------------------------------------------------------------------------------------------------------------------|
| P – Population   | Untersuchte Proband*innen sollten Personen ab einem Alter von 18 Jahren mit depressiver Symptomatik sein. Die Symptomatik musste mit validierten Fragebögen erhoben werden. Es fand kein Ausschluss aufgrund von Herkunft, Wohnort oder anderen soziodemografischen Variablen statt – speziell wurden auch Studien, die nicht in Deutschland durchgeführt wurden, eingeschlossen.                                                                                                                                                                                                                                                                                                                                                                                                                                                                                                                                                                                                                                                                                                                                |
| I – Intervention | Bei der Intervention musste es sich um eine internet-basierte Intervention im Sinne einer Selbstmanagementintervention handeln, die in Deutschland und auf Deutsch entweder frei verfügbar ist oder auf Rezept zu Lasten der Gesetzlichen Krankenversicherung verordnet werden kann (d.h. im DiGA-Verzeichnis gelistet ist). In dieser Intervention mussten evidenzbasierte psychotherapeutische Techniken angewendet werden und die vorgesehene Dauer der Intervention sollte mindestens zwei Wochen betragen. Der Behandlungsschwerpunkt der Intervention musste eine Depression sein, unabhängig von evtl. bestehenden komorbiden Störungen (nicht bspw. „Depression im Rahmen eines Diabetes“). Video- und Teletherapie sowie Begleitung durch Fachpersonal während der Intervention waren erlaubt, solange diese nur begleitend zur digitalen Selbstmanagementintervention waren und keine eigenständige Therapie darstellten. Bei mehrarmigen Studiendesigns wurde jene Experimentalgruppe ausgesucht, die der aktuell angebotenen Form der Intervention in der Versorgungsrealität am ehesten entspricht. |
| C – Control      | Die Intervention musste mit einer randomisiert-kontrollierten Studie untersucht werden. Als Kontrollbedingungen durften folgende Methoden eingesetzt werden: Warteliste, Care as Usual (Regelbehandlung), Psychoedukation, Entspannung, Aufmerksamkeit,                                                                                                                                                                                                                                                                                                                                                                                                                                                                                                                                                                                                                                                                                                                                                                                                                                                          |

|             |                                                                                                                                                                                                                         |
|-------------|-------------------------------------------------------------------------------------------------------------------------------------------------------------------------------------------------------------------------|
|             | keine Behandlung. Spezifisch ausgeschlossen werden Studien, welche eine herkömmliche Psychotherapie in Person als Kontrollbedingung nutzten.                                                                            |
| O – Outcome | Eingeschlossene Outcome-Maße beinhalteten validierte Selbst- und Fremdbeurteilungsbögen, welche Depressivität beurteilen (z.B. BDI-2, PHQ-9), oder Anzahl depressiver Symptome nach ICD-10 oder DSM (Auflage 4 oder 5). |

### 1.1.2 eTabelle 2: Übersicht über die Schritte der Literaturrecherche

|                                                                          |                                                                                                                                                                                                                                                                                                                                                                                                                                                                                                                                                                                                                                                                                                                                                                                                                                                                                                                                                                                                                                                                                                                                                                                                                                                                                                                                                                                                                                                                                                                                                                                                                                                                                                                                                                                                                                                                                                           |
|--------------------------------------------------------------------------|-----------------------------------------------------------------------------------------------------------------------------------------------------------------------------------------------------------------------------------------------------------------------------------------------------------------------------------------------------------------------------------------------------------------------------------------------------------------------------------------------------------------------------------------------------------------------------------------------------------------------------------------------------------------------------------------------------------------------------------------------------------------------------------------------------------------------------------------------------------------------------------------------------------------------------------------------------------------------------------------------------------------------------------------------------------------------------------------------------------------------------------------------------------------------------------------------------------------------------------------------------------------------------------------------------------------------------------------------------------------------------------------------------------------------------------------------------------------------------------------------------------------------------------------------------------------------------------------------------------------------------------------------------------------------------------------------------------------------------------------------------------------------------------------------------------------------------------------------------------------------------------------------------------|
| 1 – Systematische Literaturrecherche in PubMed anhand des Searchstrings: | <p>("Depression"[Mesh] OR "Depressive Disorder"[Mesh] OR "Dysthymic Disorder"[Mesh] OR "Depressive Disorder, Major"[Mesh] OR "depress*"[tiab] OR "dysthymi*"[tiab])</p> <p>AND</p> <p>("Internet-Based Intervention"[Mesh] OR "Telemedicine"[Mesh]) OR "online deliver*"[tiab] OR "online intervention*"[tiab] OR "online treat*"[tiab] OR "online therap*"[tiab] OR "online psychotherap*"[tiab] OR "digital intervention*"[tiab] OR "digital treat*"[tiab] OR "digital therap*"[tiab] OR "digital psychotherap*"[tiab] OR "mobile intervention*"[tiab] OR "mobile treat*"[tiab] OR "mobile therap*"[tiab] OR "mobile psychotherap*"[tiab] OR "mobile deliver* intervention*"[tiab] OR "mobile deliver* treat*"[tiab] OR "mobile deliver* therap*"[tiab] OR "mobile deliver* psychotherap*"[tiab] OR "mobile based intervention*"[tiab] OR "mobile based treat*"[tiab] OR "mobile based therap*"[tiab] OR "mobile based psychotherap*"[tiab] OR "internet intervention*"[tiab] OR "internet treat*"[tiab] OR "internet therap*"[tiab] OR "internet psychotherap*"[tiab] OR "internet deliver* intervention*"[tiab] OR "internet deliver* treat*"[tiab] OR "internet deliver* therap*"[tiab] OR "internet deliver* psychotherap*"[tiab] OR "internet based intervention*"[tiab] OR "internet based treat*"[tiab] OR "internet based therap*"[tiab] OR "internet based psychotherap*"[tiab] OR "self management intervention"[tiab] OR "web intervention*"[tiab] OR "web treat*"[tiab] OR "web therap*"[tiab] OR "web psychotherap*"[tiab] OR "web deliver* intervention*"[tiab] OR "web deliver* treat*"[tiab] OR "web deliver* therap*"[tiab] OR "web deliver* psychotherap*"[tiab] OR "web based intervention*"[tiab] OR "web based treat*"[tiab] OR "web based therap*"[tiab] OR "web based psychotherap*"[tiab])</p> <p>AND</p> <p>("random*" OR "RCT")</p> <p>AND</p> <p>("German" OR "Germany")</p> |
| 2 – Recherche auf Anbieterwebsites und im DiGA-Verzeichnis               | Als zweite Domäne wurden aus den in Domäne 1 identifizierten Studien die Websites der Interventionshersteller nach zusätzlichen Studien zum Produkt durchsucht. Außerdem wurde das DiGA-Verzeichnis durchsucht nach: a) Interventionen, die den Kriterien entsprechen und noch nicht in Domäne 1 identifiziert wurden; sowie b) Studien zu Interventionen, die in Domäne 1 identifiziert wurden.                                                                                                                                                                                                                                                                                                                                                                                                                                                                                                                                                                                                                                                                                                                                                                                                                                                                                                                                                                                                                                                                                                                                                                                                                                                                                                                                                                                                                                                                                                          |

|                                 |                                                                                                                                                                                                                   |
|---------------------------------|-------------------------------------------------------------------------------------------------------------------------------------------------------------------------------------------------------------------|
| 3 – Konsultation eines Experten | Im letzten Schritt wurde ein Experte für digitale Selbstmanagementinterventionen befragt (PK), ob es möglicherweise Interventionen gibt, die den Einschlusskriterien entsprechen aber nicht identifiziert wurden. |
|---------------------------------|-------------------------------------------------------------------------------------------------------------------------------------------------------------------------------------------------------------------|

1.2 eErgebnisteil A

1.2.1 eTabelle 3: Charakteristika der eingeschlossenen Studien

| Studie                  | Land   | Intervention | Zielgruppe                                                                                                                                                   | Einschlusskriterien                                                                                                                          | N (IG; KG)     | M Alter (SD)  | %-weiblich | Baseline | Kontrolle | Primäres Ergebnismaß | Anleitung                                                            | Dauer | %-dropout (IG; KG) | Follow-up                                                                                                                   | Primär Ergebnisse (Cohen's d [95%-KI]) | Ergebnisse follow-up (Cohen's d [95%-KI]) | Kommentar                                                                                                                                                         |
|-------------------------|--------|--------------|--------------------------------------------------------------------------------------------------------------------------------------------------------------|----------------------------------------------------------------------------------------------------------------------------------------------|----------------|---------------|------------|----------|-----------|----------------------|----------------------------------------------------------------------|-------|--------------------|-----------------------------------------------------------------------------------------------------------------------------|----------------------------------------|-------------------------------------------|-------------------------------------------------------------------------------------------------------------------------------------------------------------------|
| Beevers et al. (2017)   | USA    | deprexis     | Allgemeinbevölkerung; 18-55 Jahre                                                                                                                            | QIDS-SR ≥ 10                                                                                                                                 | 376 (285; 91)  | 31,91 (11,2)  | 74         | moderat  | WL        | QIDS-SR              | nein                                                                 | 8     | 22; 11             | nein                                                                                                                        | 0,80 [0,56; 1,04]                      | -                                         |                                                                                                                                                                   |
| Beiwinkel et al. (2017) | DE     | Novego       | Allgemeinbevölkerung (Screening: frühere Depression (ICD), frühere Krankschreibung aufgrund einer Depression, aktuelle Krankschreibung); mind. 18 Jahre      | PHQ-9 < 20; frühere Episode einer milden bis moderaten Depression oder Dysthymie (ICD)                                                       | 180 (100; 80)  | 47,74 (10,92) | 68         | mild     | WL; PE    | BDI-II; (PHQ-9)      | Ja, auf Anfrage via Mail oder Telefon (Psychologie B.Sc. oder höher) | 12    | 56; 45             | ja (12)                                                                                                                     | 0,41 [0,12; 0,70]                      | 0,19 [-0,22; 0,60]                        |                                                                                                                                                                   |
| Berger et al. (2011)    | DE; CH | deprexis     | Allgemeinbevölkerung; mind. 18 Jahre                                                                                                                         | BDI-II > 13                                                                                                                                  | 51 (25; 26)*   | 38,80 (14,00) | 70         | schwer   | WL        | BDI-II               | nein*                                                                | 10    | 12; 15             | ja (14), Follow-Up nur Vergleich zwischen begleitet und unbegleitet; für Kontrollgruppe keine Follow-Up Erhebung            | 0,66 [0,15; 1,17]                      | -                                         | *Studie untersuchte neben einer nicht angeleiteten ebenfalls eine angeleitete Form der Intervention, welche jedoch nicht in die vorliegende Meta-Analyse einging. |
| Bruhns et al. (2021)    | DE     | COGITO       | Studierende; mind. 18 Jahre                                                                                                                                  | PHQ > 0                                                                                                                                      | 400 (200; 200) | 22,99 (3,36)  | 89         | moderat  | WL        | PHQ-9                | nein                                                                 | 4     | 36; 33             | nein                                                                                                                        | 0,20 [0,02; 0,38]                      | -                                         |                                                                                                                                                                   |
| Bücker et al. (2018)    | DE     | deprexis     | Personen mit pathologischem Spielverhalten und mit subjektiven Gefühlen von Traurigkeit und Verzweiflung; Alter 18-65 Jahre                                  | selbstberichtete depressive Symptome (keine Angabe bezüglich eines Cut-Off Wertes)                                                           | 140 (71; 69)   | 35,71 (10,21) | 24         | moderat  | WL        | PHQ-9                | nein                                                                 | 8     | 56; 39             | nein                                                                                                                        | 0,75 [0,42; 1,08]                      | -                                         |                                                                                                                                                                   |
| Ellis et al. (2011)     | AUS    | moodgym      | Studierende; 18-25 Jahre                                                                                                                                     | K10 (Kessler Psychological Distress Scale) - niedriger bis moderater psychologischer Distress (keine Angabe bezüglich genauer Cut-Off Werte) | 26 (13; 13)*   | 19,67 (1,66)  | 77         | mild     | TAU       | DASS-21              | nein                                                                 | 3     | 0; 0               | nein                                                                                                                        | 0,40 [-0,33; 1,13]                     | -                                         | * Studie untersuchte außerdem eine Online-Selbsthilfegruppe (MoodGarden), welche jedoch nicht in die vorliegende Meta-Analyse einging.                            |
| Farrer et al. (2011)    | AUS    | moodgym      | Allgemeinbevölkerung (Anrufer bei Krisenhotline); mind. 18 Jahre                                                                                             | K10 > 22 (Kessler Psychological Distress Scale)                                                                                              | 73 (38; 35)*   | 41,53 (12,24) | 82         | schwer   | TAU       | CES-D                | nein*                                                                | 6     | 29; 23             | ja (18)                                                                                                                     | 0,76 [0,21; 1,31]                      | 1,19 [0,54; 1,84] (web only)              | *Studie untersuchte neben einer nicht angeleiteten ebenfalls eine angeleitete Form der Intervention, welche jedoch nicht in die vorliegende Meta-Analyse einging. |
| Fischer et al. (2015)   | DE     | deprexis     | Personen mit einer multiplen Sklerosis Diagnose und depressiven Symptomen (rekrutiert über Datenbank der MS-Ambulanz des UKE und Internetforen); 18-65 Jahre | selbstberichtete depressive Symptome (keine Angabe bezüglich eines Cut-Off Wertes)                                                           | 90 (45; 45)    | 45,28 (11,6)  | 78         | mild     | WL        | BDI-II               | nein                                                                 | 9     | 22; 20             | ja (24), fehlende Daten (es ist nur der BDI Mittelwert für die Interventionsgruppe vor und nach der Intervention berichtet) | 0,53 [0,10; 0,96]                      | -                                         |                                                                                                                                                                   |
| Fuhr et al. (2018)      | DE     | deprexis     | Personen, die aufgrund einer depressiven Symptomatik auf der Warteliste für einen ambulanten Psychotherapieplatz                                             | depressive Symptome (MINI; keine Angaben zu Cut-Off Werten)                                                                                  | 31 (17; 14)    | 37,70 (13,64) | 67         | moderat  | WL (PT)   | PHQ-9                | nein                                                                 | 10    | 18; 7              | nein                                                                                                                        | -0,04 [-0,67; 0,59]                    | -                                         |                                                                                                                                                                   |

|                         |     |          |                                                                                                                                                                       |                                                                                                                        |                   |               |      |                  |         |                 |                                                                                                                                      |    |        |                                                                                                                                                                                                                          |                    |                               |                                                                                                                                                                                                 |  |
|-------------------------|-----|----------|-----------------------------------------------------------------------------------------------------------------------------------------------------------------------|------------------------------------------------------------------------------------------------------------------------|-------------------|---------------|------|------------------|---------|-----------------|--------------------------------------------------------------------------------------------------------------------------------------|----|--------|--------------------------------------------------------------------------------------------------------------------------------------------------------------------------------------------------------------------------|--------------------|-------------------------------|-------------------------------------------------------------------------------------------------------------------------------------------------------------------------------------------------|--|
|                         |     |          | der Hochschulambulanz Tübingen standen; mind. 18 Jahre                                                                                                                |                                                                                                                        |                   |               |      |                  |         |                 |                                                                                                                                      |    |        |                                                                                                                                                                                                                          |                    |                               |                                                                                                                                                                                                 |  |
| Gilbody et al. (2015)   | UK  | moodgym  | primäre Versorgung (aktuell nicht in Psychotherapie); mind. 18 Jahre                                                                                                  | PHQ-9 ≥ 10                                                                                                             | 481 (242; 239)*   | 39,86 (12,65) | 67   | moderat - schwer | TAU     | PHQ-9           | Ja (wöchentliche Telefonate)                                                                                                         | 16 | 25; 25 | ja (32; 80)                                                                                                                                                                                                              | 0,01 [-0,24; 0,26] | 0,32 [0,05; 0,59] (32 Wochen) | *Studie untersuchte außerdem eine dritte Gruppe mit der in Deutschland nicht verfügbaren Anwendung ("Beating the Blues"), welche nicht in die vorliegende Meta-Analyse einging.                 |  |
| Gräfe et al. (2020)     | DE  | deprexis | Patient:innen mit milder bis moderater depressiven Episode nach ICD; Allgemeinbevölkerung (rekrutiert über Krankenkasse); mind. 18 Jahre                              | PHQ-9 > 4                                                                                                              | 3805 (1904; 1901) | 45 (10,90)    | 79   | moderat          | TAU; PE | PHQ-9           | nein                                                                                                                                 | 12 | 27; 26 | ja (12; 36)                                                                                                                                                                                                              | 0,37 [0,29; 0,45]  | 0,23 [0,15; 0,31] (12 Wochen) |                                                                                                                                                                                                 |  |
| Høifødt et al. (2013)   | NOR | moodgym  | Allgemeinbevölkerung / primary care (rekrutiert durch Hausarztpraxen, Hausarzt-Pflegepersonal, Warteliste von psychiatrischer ambulanter Klinik); 18-65 Jahre         | BDI-II 10-40                                                                                                           | 106 (52; 54)      | 36,10 (11,30) | 73   | moderat          | WL      | BDI-II          | Ja, kurzer therapeutischer face to face Kontakt und personalisierte E-Mails zwischen den Sessions                                    | 6  | 29; 13 | ja (18), jedoch falscher Vergleich (die Kontrollgruppe hat während des Follow-Up Zeitraums die Intervention erhalten. Somit haben beim Follow-Up Zeitpunkt beide Gruppen die Intervention erhalten (nur eben verzögert)) | 0,65 [0,18; 1,12]  | -                             |                                                                                                                                                                                                 |  |
| Klein et al. (2016)     | DE  | deprexis | Patient:innen mit milder bis moderater depressiven Symptomatik (Selbstbericht); Allgemeinbevölkerung und stationäres sowie ambulantes klinisches Setting; 18-65 Jahre | PHQ-9 5-14                                                                                                             | 1013 (509; 504)   | 42,85 (11,00) | 69   | moderat          | WL      | PHQ-9           | ja/nein, Proband:innen mit einem Baseline PHQ-9 zwischen 10-14 erhielten begleitete Version in Form von wöchentlichem E-Mail Support | 12 | 22; 21 | ja (12)                                                                                                                                                                                                                  | 0,39 [0,14; 0,64]  | 0,32 [0,07; 0,57]             |                                                                                                                                                                                                 |  |
| Krämer et al. (2022)    | DE  | Selfapy  | Allgemeinbevölkerung; 18 - 65 Jahre                                                                                                                                   | BDI-II ≥ 13; Diagnose einer Major Depression / Dysthymie basierend auf dem MINI                                        | 250 (150; 100)*   | 37,00 (11,00) | 83   | schwer           | WL; AC  | BDI-II          | nein*                                                                                                                                | 12 | 23; 47 | ja (12), jedoch nur within-group Daten für den Follow-Up Erhebungszeitpunkt, daher nicht teil der Meta-analyse                                                                                                           | 1,47 [1,22; 1,72]  | -                             | *Studie untersuchte neben einer nicht angeleiteten ebenfalls eine angeleitete Form der Intervention, welche jedoch nicht in die vorliegende Meta-Analyse einging.                               |  |
| Löbner et al. (2018)    | DE  | moodgym  | Allgemeinbevölkerung (rekrutiert aus Hausärzt:in-Setting); mind. 18 Jahre                                                                                             | Diagnose einer aktuellen milden oder moderaten ersten oder wiederkehrenden depressiven Episode nach ICD-10; PHQ-9 5-19 | 647 (320; 327)    | 43,89 (13,26) | 68   | moderat          | TAU     | BDI-II; (PHQ-9) | nein                                                                                                                                 | 6  | 19; 6  | ja (18)                                                                                                                                                                                                                  | 0,36 [0,19; 0,53]  | 0,41 [0,21; 0,61]             |                                                                                                                                                                                                 |  |
| Lüdtke et al. (2018)    | DE  | COGITO   | Allgemeinbevölkerung (rekrutiert über ambulante Versorgung, Online-Foren für Depressionen); 18-65 Jahre                                                               | subjektives Bedürfnis nach einer Behandlung um depressive Symptome zu reduzieren                                       | 88 (44; 44)       | 42,89 (11,28) | 78   | moderat          | WL      | PHQ-9           | nein                                                                                                                                 | 4  | 20; 11 | nein                                                                                                                                                                                                                     | 0,00 [-0,41; 0,41] | -                             |                                                                                                                                                                                                 |  |
| Mackinnon et al. (2008) | AUS | moodgym  | Allgemeinbevölkerung; 18-52 Jahre                                                                                                                                     | keine Angabe                                                                                                           | 360 (182; 178)*   | k.A.          | k.A. | moderat          | AUF     | CES-D           | Ja, wöchentliche 10 minütige Telefonate                                                                                              | 6  | 25; 11 | ja (18, 42)                                                                                                                                                                                                              | 0,41 [0,19; 0,63]  | 0,22 [0,02; 0,42] (18 Wochen) | *Studie untersuchte zudem einen Interventionsarm mit Teilnehmer*innen die Zugang zu einer Depressionsinformationsseite erhielten, welcher jedoch nicht in die vorliegende Meta-Analyse einging. |  |

|                        |    |                  |                                                                                                                                                                                       |                                                                                                                                                                                                                                                                                                                                                                                                |                   |               |    |                  |     |        |                                                                                                                                                              |    |        |                                                                                              |                    |                               |  |
|------------------------|----|------------------|---------------------------------------------------------------------------------------------------------------------------------------------------------------------------------------|------------------------------------------------------------------------------------------------------------------------------------------------------------------------------------------------------------------------------------------------------------------------------------------------------------------------------------------------------------------------------------------------|-------------------|---------------|----|------------------|-----|--------|--------------------------------------------------------------------------------------------------------------------------------------------------------------|----|--------|----------------------------------------------------------------------------------------------|--------------------|-------------------------------|--|
| Meyer et al. (2009)    | DE | deprexis         | Allgemeinbevölkerung (rekrutiert über Internetforen); mind. 18 Jahre                                                                                                                  | keine Angabe                                                                                                                                                                                                                                                                                                                                                                                   | 396 (320; 76)     | 34,76 (11,60) | 76 | moderat          | WL  | BDI-I  | nein                                                                                                                                                         | 9  | 50; 25 | ja (9; 24)                                                                                   | 0,30 [0,05; 0,55]  | 0,26 [-0,11; 0,63] (9 Wochen) |  |
| Meyer et al. (2015)    | DE | deprexis         | Patient:innen mit moderater bis schwerer oder schwerer depressiven Symptomatik (Selbstbericht); Allgemeinbevölkerung und stationäres sowie ambulantes klinisches Setting; 18-65 Jahre | PHQ-9 > 14                                                                                                                                                                                                                                                                                                                                                                                     | 163 (78; 85)      | 42,00 (11,39) | 75 | moderat - schwer | WL  | PHQ-9  | nein                                                                                                                                                         | 12 | 22; 14 | ja (12)                                                                                      | 0,57 [0,22; 0,92]  | 0,33 [-0,02; 0,68]            |  |
| Miegel et al. (2019)   | DE | Novego           | Allgemeinbevölkerung; 18-75 Jahre                                                                                                                                                     | depressive Symptome (keine Diagnose erforderlich, sondern auf Basis der subjektiven Einschätzung der Teilnehmer:innen; außerdem subjektive Schmerzsymptome),                                                                                                                                                                                                                                   | 142 (71; 71)      | 48,15 (11,87) | 77 | moderat          | WL  | BDI-II | Ja, Möglichkeit bei Fragen ein Team aus Psycholog:innen zu kontaktieren                                                                                      | 12 | 32; 15 | nein                                                                                         | 0,42 [0,09; 0,75]  | -                             |  |
| Moritz et al. (2012)   | DE | deprexis         | Allgemeinbevölkerung (rekrutiert über Support Networks im Internet für Depressionen); 18-65 Jahre                                                                                     | keine Angabe                                                                                                                                                                                                                                                                                                                                                                                   | 210 (105; 105)    | 38,57 (13,29) | 79 | schwer           | WL  | BDI-I  | nein                                                                                                                                                         | 8  | 24; 14 | nein                                                                                         | 0,36 [0,03; 0,69]  | -                             |  |
| Moritz et al. (2016)   | DE | Novego           | Personen mit einer Schizophreniediagnose (ehemalige Patient:innen einer Klinik für Psychiatrie und Psychotherapie (UKE), modertierte Internetforen für Schizophrenie); 18-65 Jahre    | aktuell subjektiv erlebte depressive Symptome; kein formaler Cut-Off Wert                                                                                                                                                                                                                                                                                                                      | 58 (31; 27)       | 40,62 (10,22) | 53 | schwer           | WL  | CES-D  | nein                                                                                                                                                         | 12 | 19; 11 | nein                                                                                         | 0,91 [0,36; 1,46]  | -                             |  |
| Oehler et al. (2020)   | DE | iFightDepression | Allgemeinbevölkerung; mind. 18 Jahre                                                                                                                                                  | Diagnose einer aktuellen milden oder moderaten depressiven Störung oder Dysthymie basierend auf dem MINI; PHQ-9 5-14                                                                                                                                                                                                                                                                           | 347 (173; 174)    | 42,30 (12,40) | 79 | moderat          | PMR | IDS-SR | Ja, 5 telefonische Termine mit Psychotherapeut:innen                                                                                                         | 6  | 18; 26 | ja (12; 24; 48)                                                                              | 0,19 [-0,03; 0,41] | 0,28 [0,06; 0,50] (12 Wochen) |  |
| Philipps et al. (2014) | UK | moodgym          | Arbeitnehmer:innen; mind. 18 Jahre                                                                                                                                                    | PHQ-9 Score von 2 oder mehr auf 5 der 9 Items, einschließlich ein Score von 2 oder mehr auf Item 1 (wenig Interesse an Aktivitäten) oder Item 2 (sich hoffnungslos fühlen); Proband:innen müssen zusätzlich bestätigen, dass zumindest eins der Items ein Problem für sie darstellt, welches es für sie schwierig macht zu arbeiten, den Haushalt oder zwischenmenschliche Kontakte zu pflegen | 637 (318; 319)    | 42,45 (9,60)  | 51 | moderat          | PE  | PHQ-9  | Nein, KG und EG erhielten wöchentliche 10 minütige telefonische Interviews - Zweck: Teilnahmemotivation erhöhen, Risikoscreening, Sammlung von Nutzungsdaten | 5  | 46; 41 | ja (7), jedoch fehlende Daten (kombinierte Effektstärke aus post intervention und follow up) | 0,07 [-0,09; 0,23] | -                             |  |
| Powell et al. (2013)   | UK | moodgym          | Allgemeinbevölkerung; mind. 18 Jahre                                                                                                                                                  | keine Angabe                                                                                                                                                                                                                                                                                                                                                                                   | 3070 (1534; 1536) | 41,14 (13,01) | 78 | k.A.             | WL  | WEMWBS | nein                                                                                                                                                         | 6  | 64; 21 | ja (6), jedoch fehlende Daten                                                                | 0,21 [0,11; 0,31]  | -                             |  |

|                        |     |          |                                                                                                                                                |                                                                                         |              |               |    |         |     |         |                                                              |   |        |                           |                    |   |                                                                                                                                                                    |
|------------------------|-----|----------|------------------------------------------------------------------------------------------------------------------------------------------------|-----------------------------------------------------------------------------------------|--------------|---------------|----|---------|-----|---------|--------------------------------------------------------------|---|--------|---------------------------|--------------------|---|--------------------------------------------------------------------------------------------------------------------------------------------------------------------|
| Schröder et al. (2014) | GER | deprexis | Personen mit einer Epilepsie-Diagnose (rekrutiert über Datenbank eines Epilepsiezentrum und Internetforen); mind. 18 Jahre                     | selbstberichtete depressive Symptome                                                    | 78 (38; 40)  | 37,59 (10,94) | 76 | moderat | WL  | BDI-I   | nein                                                         | 9 | 34; 20 | nein                      | 0,29 [-0,22; 0,80] | - |                                                                                                                                                                    |
| Sethi (2013)           | AUS | moodgym  | Allgemeinbevölkerung (Jugendzentren und Studierende); 18-25 Jahre                                                                              | DASS-21: 10-20 (Depression) und / oder 8-14 (Angst)                                     | 46 (23; 23)* | 20,08 (1,72)  | 67 | moderat | TAU | DASS-21 | Ja, Psycholog:in steht zur Verfügung bei aufkommenden Fragen | 5 | 0; 0   | nein                      | 0,70 [-0,10; 1,50] | - | *Studie untersuchte außerdem eine Gruppe mit face-to-face Therapie und eine mit blended Treatment, welche beide nicht in die vorliegende Meta-Analyse miteingingen |
| Twomey et al. (2014)   | IRE | moodgym  | Personen auf der Warteliste für öffentliche mental health services und depressiven, ängstlichen und / oder Stress-Symptomen; Alter 18-61 Jahre | depressive, ängstliche und / oder Stresssymptome, nachgewiesen durch Überweisungsschein | 149 (80; 69) | 35,30 (10,30) | 74 | moderat | WL  | DASS-21 | nein                                                         | 5 | 56; 29 | Nein, bzw. zu wenig Daten | 0,19 [-0,30; 0,68] | - |                                                                                                                                                                    |

Anmerkung. %-weiblich = Prozentanteil weiblicher Probandinnen; AC = Achtsamkeit; AUF = Aufmerksamkeit, Baseline = Schwere der depressiven Symptomatik vor Untersuchungszeitraum; Dauer = Interventionsdauer in Wochen; Follow-up = Nachverfolgungszeitraum nach Interventionsende in Wochen; IG = Interventionsgruppe; KG = Kontrollgruppe; PE = Psychoedukation; PMR = Progressive Muskelrelaxation; TAU = Regelversorgung; WL = Warteliste; WL (PT) = Warteliste für ambulante Psychotherapie; nein\* = Studie untersuchte neben einer nicht angeleiteten ebenfalls eine angeleitete Form der Intervention, welche jedoch nicht in die vorliegende Meta-Analyse einging

### 1.2.2 eAbbildung 1: Flussdiagramm zum Identifikationsprozess relevanter Studien

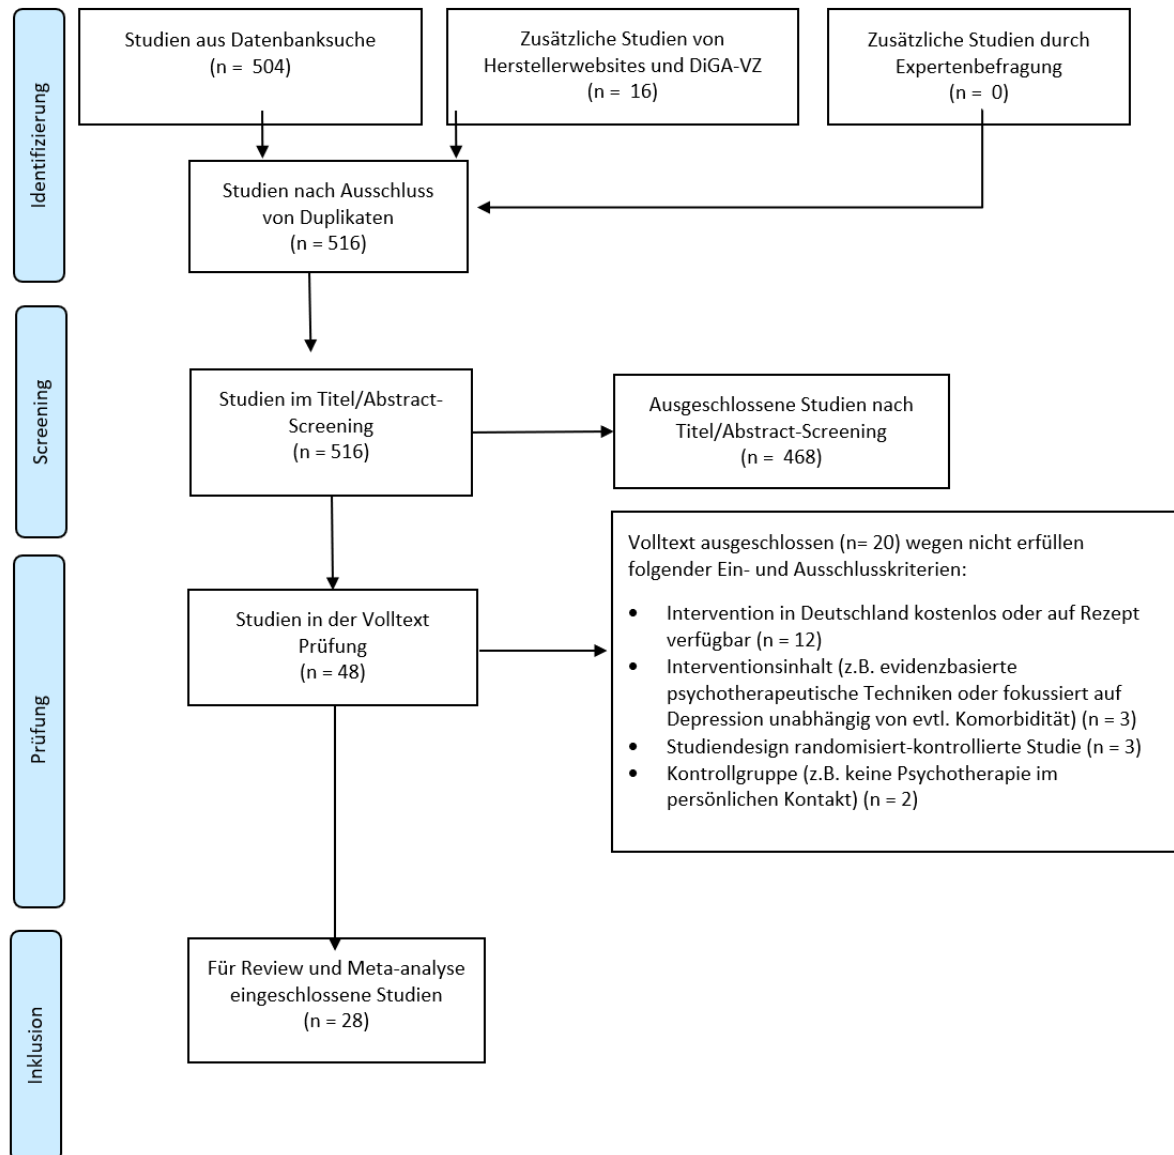

### 1.2.3 Risk of Bias

Alle im Review eingeschlossenen Studien wurden hinsichtlich ihres Risk of Bias unabhängig von zwei Reviewern (NW und PV) bewertet. Dies wurde anhand des Risk of Bias 2 (RoB-2) Tools der Cochrane-Collaboration auf Studienebene und Domänenebene durchgeführt. Das Tool enthält folgende Domänen: (1) Bias durch den Randomisierungsprozess, (2) Bias durch Abweichung von der geplanten Intervention, (3) Bias durch fehlende Daten, (4) Bias durch die Messung des Outcomes, (5) Bias durch die Auswahl des berichteten Ergebnisses, sowie ein sich aus den Domänenratings ergebendes Gesamtrating. Pro Domäne beinhaltet das Tool Fragen zur Methodik der zu bewertenden Studie sowie einen Entscheidungsbaum. Dadurch können die Domänen dreistufig klassifiziert werden in a)



niedriges Bias-Risiko, b) mittelgroßes Bias-Risiko und c) hohes Bias-Risiko. Abweichungen in der Bewertung zwischen den beiden Reviewern wurden im Anschluss identifiziert und Unstimmigkeiten durch Konsens geklärt.

*Abbildung 2: Zusammengefasstes Bias-Risiko der eingeschlossenen Studien auf den Domänen des RoB-2 Tools.*

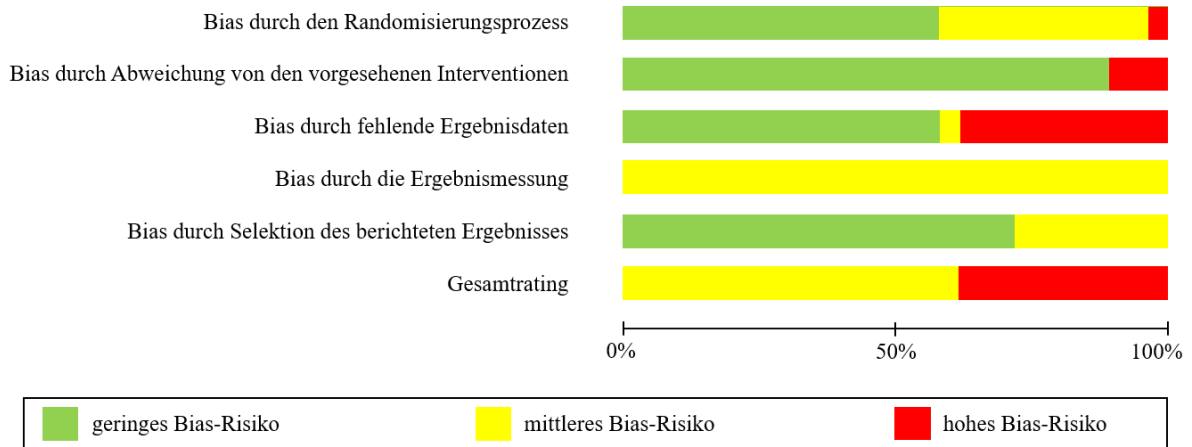

eAbbildung 3: Bias-Risiko auf Studienebene auf den Domänen des RoB-2 Tools.

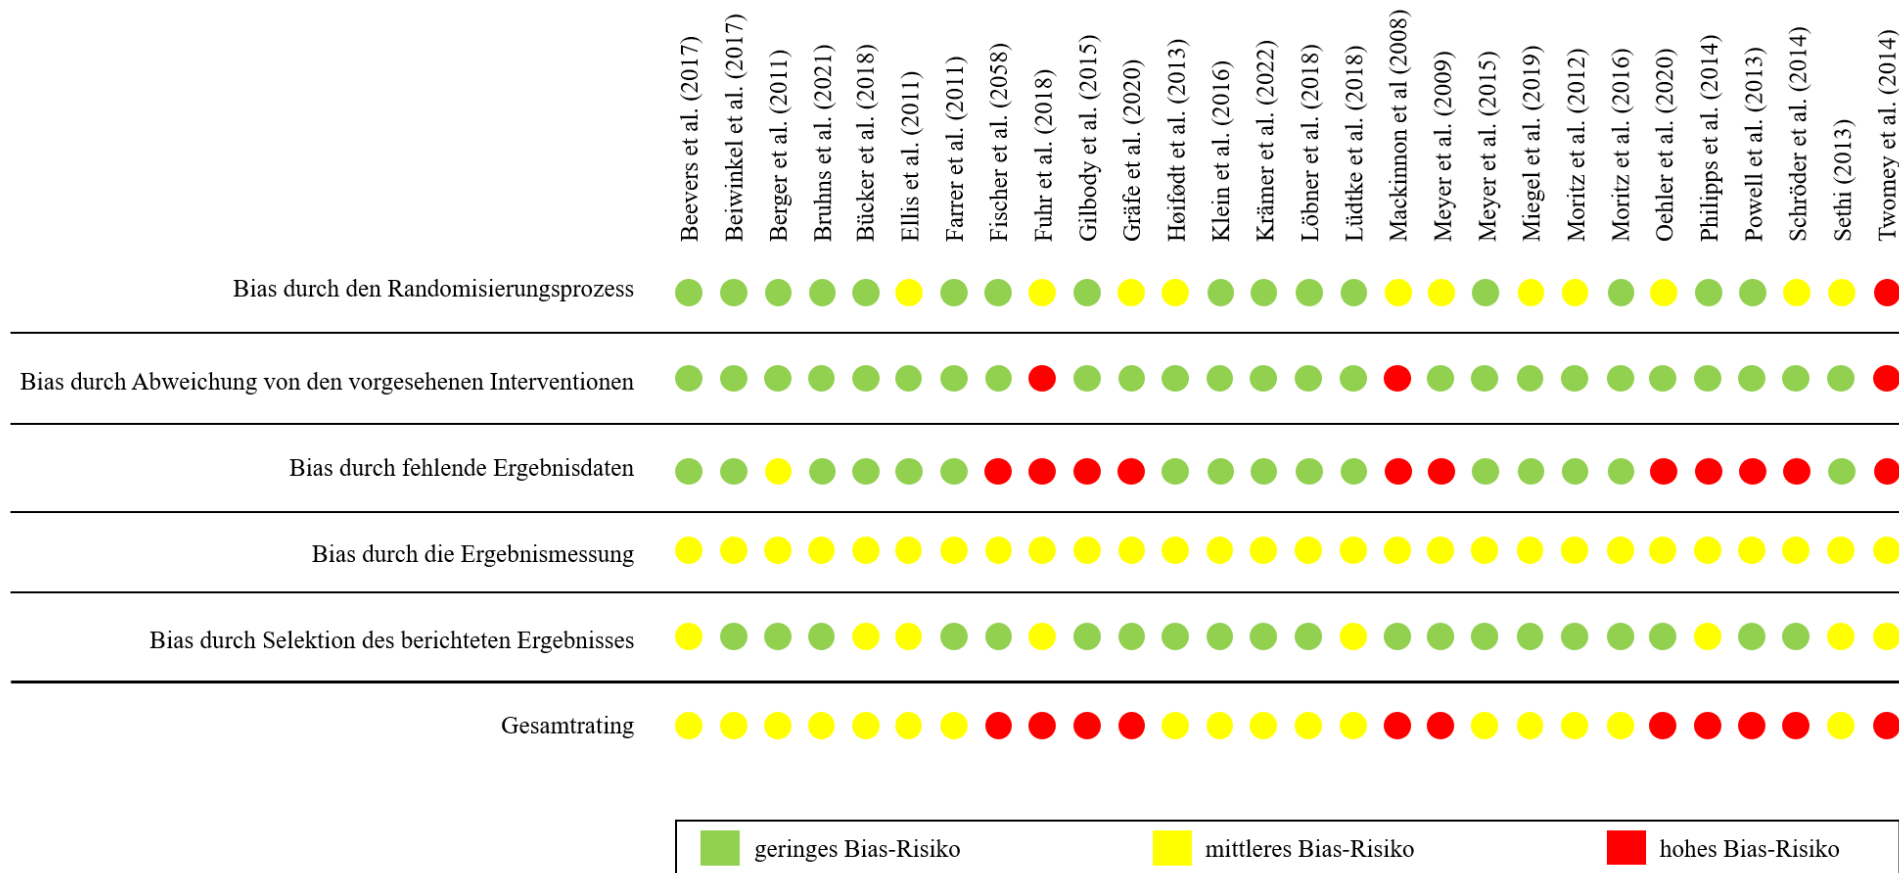

#### 1.2.4 Follow-up Analyse

Von den 16 identifizierten Studien, die zusätzlich zum Post-Interventions-Zeitpunkt eine Follow-Up Erhebung der depressiven Symptomatik durchführten, konnten sechs Studien aufgrund fehlender oder unpassender Daten nicht in die Analyse eingeschlossen werden: Berger et al. (2011), Fischer et al. (2015) und Krämer et al. (2022) berichteten die Daten für die Follow-Up Erhebung nur für die Interventionsgruppe und nicht für die Kontrollgruppe. In der Studie von Høifødt et al. (2013) erhielt die Kontrollgruppe zum Zeitpunkt der Follow-Up Erhebung die Intervention bereits. Phillips et al. (2014) gibt die Effektstärke nur in Form einer kombinierten Effektstärke aus dem Postintervention und Follow-Up Erhebungszeitpunkt an und Powell et al. (2013) berichtet zu wenig Daten, um die Effektstärke nach Cohen's  $d$  zu berechnen.

#### 1.2.5 Sensitivitätsanalysen

**1) hohes Bias Risiko.** Insgesamt zeigten 11 der 28 inkludierten Studien ein hohes Bias-Risiko. In einer separaten Sensitivitätsanalyse, in der die elf Studien ausgeschlossen wurden, die in der Gesamtbeurteilung ein hohes Bias-Risiko erhielten, zeigte sich eine Effektstärke von  $d = 0,57$ , 95%-KI: [0,38; 0,76],  $I^2 = 82\%$  zum Post-Interventions-Zeitpunkt. Die Analyse der Follow-Up Daten ergab nach Ausschluss von fünf Studien mit einer hohen Bias-Risiko-Beurteilung eine Effektstärke von  $d = 0,40$ , 95%-KI: [0,20; 0,59],  $I^2 = 45\%$ .

**2) aktive Kontrollgruppe.** Für den Postinterventions-Zeitpunkt zeigte sich nach Ausschluss von sechs Studien mit einer aktiven Kontrollgruppe ein kleiner Effekt von  $d = 0,40$ , 95%-KI: [0,29; 0,51],  $I^2 = 61\%$ . Die Analyse der Follow-Up Daten ergab nach Ausschluss von insgesamt vier Studien mit einer aktiven Kontrollgruppe eine Effektstärke von  $d = 0,38$ , 95%-KI: [0,23; 0,53],  $I^2 = 28\%$ .

**3) Population mit einer zusätzlichen komorbiden psychischen oder neurologischen Störung.** In einer weiteren Sensitivitätsanalyse wurden Studien ausgeschlossen, die eine spezifische Stichprobe mit einer zusätzlichen neurologischen oder psychischen Erkrankung untersuchten (pathologisches Glücksspielverhalten (18), multiple Sklerose (19), Schizophrenie (39), Epilepsie (17)). Nach Ausschluss dieser vier Studien zeigte sich eine Effektstärke von  $d = 0,40$ , 95%-KI: [0,28; 0,52],  $I^2 = 83\%$  zum Post-Interventions-Zeitpunkt.

**4) nicht- deutschsprachige Studien.** Da einige der Interventionen in mehreren Sprachen verfügbar sind und sich die Interventionen auf den verschiedenen Sprachen unterscheiden könnten, wurde eine Sensitivitätsanalyse hinsichtlich der Studienherkunft durchgeführt. Schließt man die Studien an nicht-deutschsprachigen Stichproben ( $n = 10$ ) aus, so erhält man eine Effektstärke von  $d = 0,46$ , 95%-KI: [0,32; 0,61].

#### 1.2.6 Subgruppenanalyse

eTabelle 4: Übersicht über die durchgeführte Subgruppenanalyse zum Faktor DiGA oder frei verfügbar

| Faktor                | n  | d     | 95%-KI       | $I^2$ |
|-----------------------|----|-------|--------------|-------|
| <b>DiGA (ja/nein)</b> |    |       |              |       |
| DiGA                  | 15 | 0.56* | [0.38, 0.74] | 83%   |
| freiverfügbar         | 13 | 0.24* | [0.14, 0.33] | 44%   |
| DiGA (FU)             | 5  | 0.24  | [0.17, 0.31] | 0%    |
| freiverfügbar (FU)    | 5  | 0.36  | [0.19, 0.53] | 55%   |

Anmerkung: FU = Follow-Up-Zeitpunkt; n = Studienanzahl; d = Effektgröße (Cohen's d); 95%-KI = 95%-Konfidenzintervall; I<sup>2</sup> = Maß für die vorliegende Heterogenität nach Higgins; \* = statistisch signifikanter Unterschied zwischen den beiden Subgruppen (p < 0.05).

### 1.3 eErgebnisteil B: Tabellarische und narrative Übersicht über die identifizierten Interventionen

Der folgende Überblick ergänzt eine tabellarische Übersicht, die von drei der Autor:innen (JPK, PV, NW) bereits online zur Verfügung gestellt wurde (DOI:[10.13140/RG.2.2.31734.52803](https://doi.org/10.13140/RG.2.2.31734.52803)).

#### 1.3.1 COGITO

Die Anwendung *COGITO* wurde am Universitätsklinikum Hamburg Eppendorf entwickelt. *COGITO* ist nicht im DiGA-Verzeichnis gelistet und kann kostenlos genutzt werden. Es handelt sich um eine Smartphone-App, welche für die mobilen Betriebssysteme iOS und Android zur Verfügung steht. Das für depressive Störungen relevante Basispaket „Stimmung und Selbstwert“ des Kurses besteht aus 66 kurzen Übungen, welche auf vier Module aufgeteilt sind: Lebensfreude & Neue Blickwinkel (kognitive Strategien), Aktivität & Energie (Verhaltensaktivierung, Werte, Ressourcen), Kommunikation & Beziehungen (soziale Kompetenzen), und Achtsamkeit & Innere Ruhe (Akzeptanz, Dankbarkeit, Entspannung). Zusätzlich können eigene Übungen erstellt werden. Der therapeutische Ansatz des Kurses basiert vor allem auf dem Metakognitiven Training, der kognitiven Verhaltenstherapie und dritte-Welle Verfahren wie Achtsamkeit und Akzeptanz. Die App wird ohne Begleitung durch Fachpersonal benutzt. Die einzelnen Übungen nehmen jeweils nur wenige Minuten in Anspruch und sollen somit gut in den Alltag integrierbar sein. Es gibt keine empfohlene Nutzungsdauer, allerdings untersuchten beide identifizierten RCTs die Effektivität von *COGITO* über einen Interventionszeitraum von vier Wochen (13, 14). Um die Motivation und die Adhärenz zu fördern, kommen Gamification-Elemente in Form von Medaillenauszeichnung zum Einsatz, ebenso wie automatische wöchentliche Rückmeldungen mit einem Überblick der Anzahl an absolvierten Übungen in den letzten sieben Tagen. *COGITO* wurde bisher in zwei randomisiert kontrollierten Studien untersucht (13, 14). Beide Studien gingen in die vorliegende Metaanalyse ein.

| <b><u>COGITO</u><sup>4</sup></b>                  |                                                                                                                                              |
|---------------------------------------------------|----------------------------------------------------------------------------------------------------------------------------------------------|
| Indikation                                        | Depressive Störung                                                                                                                           |
| Therapieprinzip                                   | KVT, Metakognitives Training (MCT), Achtsamkeit und Akzeptanz                                                                                |
| Wirkstärke im Vergleich zur Kontrollgruppe        | RCTs: d = 0,26 (PP) (400 Teilnehmende) (Bruhns et al., 2021); d = 0,00 (ITT) (90 Teilnehmende) (Lüdtke et al., 2018)                         |
| Möglichkeit der Integration in die f2f-Behandlung | 0: Intervention kann unabhängig von der f2f-Behandlung bearbeitet werden                                                                     |
| PZN                                               | –                                                                                                                                            |
| Sprachen                                          | Deutsch, Englisch, Türkisch, Arabisch, Serbisch, Norwegisch, Italienisch, Spanisch, Portugiesisch, Französisch, Finnisch, Polnisch, Persisch |

|             |                                    |
|-------------|------------------------------------|
| Plattformen | Apple App Store, Google Play Store |
|-------------|------------------------------------|

<sup>4</sup>Im iOS App-Store und Google Play Store zum Download kostenlos verfügbar / weitere Informationen unter <https://clinical-neuropsychology.de/cogito/>

### 1.3.2 *deprexis*

Die Intervention *deprexis* der GAIA AG ist seit Frühjahr 2021 dauerhaft im DiGA-Verzeichnis gelistet. *deprexis* ist bei Vorliegen einer leichten bis schwer ausgeprägten depressiven Störung (F32.0, F32.1, F32.2, F33.0, F33.1, F33.2) indiziert und kann ab einem Alter von 18 Jahren verordnet werden. Der therapeutische Ansatz des Kurses basiert größtenteils auf Techniken der kognitiven Verhaltenstherapie. Insgesamt besteht der Kurs aus zwölf Modulen, wovon neben einem Einleitungs- und einem Abschlussmodul zehn Module psychotherapeutischen Inhalte vermitteln. Dabei gibt es folgende inhaltliche Bausteine: Verhaltensaktivierung, Kognitive Umstrukturierung, Achtsamkeit und Akzeptanz, Interpersonelle Fähigkeiten, Relaxation und Lifestyle-Modifikation, Problemlösen, Kindheitserfahrungen und Schemata, Positive Psychologie, Emotionsfokussierte Techniken, Psychoedukation. Die Module bestehen aus Informationstexten, Video- und Audiomaterial sowie simulierten Dialogen, welche dynamisch auf User-Input reagieren sollen (23). Pro Modul wird eine Bearbeitungsdauer von 10 bis 60 Minuten geschätzt. Der Kurs ist nicht durch Fachpersonal begleitet. Die gesamte Nutzungsdauer beträgt 90 Tage. Die Wirksamkeit von *deprexis* wurde bisher in 13 randomisiert kontrollierten Studien nachgewiesen. Zwölf dieser Studien wurden in einer *deprexis* spezifischen Metaanalyse ausgewertet (Twomey et al. 2020). In die vorliegende Metaanalyse gingen elf dieser Studien ein.

| <b><u>deprexis</u></b> <sup>3</sup>               |                                                                                                              |
|---------------------------------------------------|--------------------------------------------------------------------------------------------------------------|
| Indikation                                        | Depressive Störung (leicht bis schwer)                                                                       |
| Therapieprinzip                                   | KVT, aber auch andere psychotherapeutische Techniken; alle Inhalte werden in simulierten Dialogen vermittelt |
| Wirkstärke im Vergleich zur Kontrollgruppe        | Metaanalyse: $g = 0,51$ (12 Studien mit 2901 Teilnehmenden) (Twomey et al., 2020)                            |
| PZN                                               | 17265872                                                                                                     |
| Möglichkeit der Integration in die f2f-Behandlung | 0: DiGA kann unabhängig von der f2f-Behandlung bearbeitet werden                                             |
| Sprachen                                          | Chinesisch, Deutsch, Englisch, Französisch, Griechisch, Italienisch, Portugiesisch, Schwedisch, Spanisch     |
| Plattformen                                       | Webanwendung                                                                                                 |

<sup>3</sup>Kontakt: [info@deprexis.de](mailto:info@deprexis.de)

### 1.3.3 *iFightDepression*

Der *iFightDepression*-Kurs wurde von der European Alliance Against Depression entwickelt und richtet sich an Erwachsene und Jugendliche ab 15 Jahren, die an einer leichten bis mittelgradigen depressiven Störung leiden. Der Kurs muss durch einen Arzt oder Psychotherapeuten, der vorher

eine kostenlose spezifische Schulung durchlaufen hat, freigeschaltet werden. Die Nutzung ist dann für beide Seiten kostenlos. So kann iFightDepression nur in Begleitung durch therapeutisches Personal genutzt werden. Dabei bestehe die Begleitung vor allem daraus, den Patient\*innen administrative und motivationale Unterstützung zu geben. Der therapeutische Ansatz des Kurses basiert auf Techniken der kognitiven Verhaltenstherapie und besteht aus sechs Modulen: Denken, Fühlen und Tun (Psychoedukation, Selbstbeobachtung), Schlaf und Depression, Planen und Durchführen angenehmer Aktivitäten (Aktivitätenaufbau), Dinge schaffen (Problemlösetraining, Zielsetzung), Negative Gedanken identifizieren, Negative Gedanken ändern (kognitive Umstrukturierung). Die Module bestehen aus Informationstexten, Arbeitsblättern und Aufgaben. Es gibt keine empfohlene Nutzungsdauer, allerdings untersuchte das identifizierte RCT die Effektivität vom iFightDepression-Kurs über einen Interventionszeitraum von sechs Wochen. Eine durchschnittliche Bearbeitungsdauer pro Modul ist nicht angegeben. Die Wirksamkeit von iFightDepression bei einer leichten und mittelgradigen depressiven Störung wurde in einer Studie untersucht, die in die vorliegende Metaanalyse aufgenommen wurde.

| <b><u>iFightDepression</u></b> <sup>5</sup>       |                                                                                                                                                                                                     |
|---------------------------------------------------|-----------------------------------------------------------------------------------------------------------------------------------------------------------------------------------------------------|
| Indikation                                        | Depressive Störung                                                                                                                                                                                  |
| Therapieprinzip                                   | KVT, u.a. kognitive Techniken, Verhaltensaktivierung, Schlafregulation                                                                                                                              |
| Wirkstärke im Vergleich zur Kontrollgruppe        | RCT: $d = 0,19$ (ITT) (Follow-up nach 3 Monaten: $d = 0,28$ ) (348 Teilnehmende) (Oehler et al., 2020)                                                                                              |
| Möglichkeit der Integration in die f2f-Behandlung | 3: Intervention kann nicht unabhängig von f2f-Behandlung verwendet werden, Integration in f2f-Behandlung notwendig                                                                                  |
| PZN                                               | –                                                                                                                                                                                                   |
| Sprachen                                          | Deutsch, Englisch, Spanisch, Französisch, Niederländisch, Italienisch, Portugiesisch, Russisch, Polnisch, Norwegisch, Türkisch, Griechisch, Estnisch, Bulgarisch, Katalanisch, Ungarisch, Albanisch |
| Plattformen                                       | Webanwendung                                                                                                                                                                                        |

<sup>5</sup> Freier Zugang für Patient\*innen, deren Behandler\*in ein 70-minütiges Webinar abgeschlossen hat: <https://ifightdepression.com/webinar/>

#### 1.3.4 moodgym

Moodgym wurde von der Australian National University entwickelt und ist seit 2016 auf Deutsch frei im Internet verfügbar. Die Webanwendung moodgym wurde ursprünglich von Wissenschaftler\*innen der Australian National University in englischer Sprache entwickelt. Es gibt keine offizielle Indikation für die Nutzung, allerdings zielt moodgym primär auf die Verbesserung von depressiver Symptomatik, sekundär auf Ängstlichkeit und generelles psychisches Wohlbefinden ab. Es gibt keine empfohlene Nutzungsdauer, die meisten Studien nutzten jedoch einen Interventionszeitraum von sechs Wochen. Insgesamt besteht moodgym aus sieben Modulen, davon fünf mit inhaltlichen

Schwerpunkten und je eines zur Einleitung und zum Review. Die Bearbeitungszeit wird pro Modul auf 30 bis 60 Minuten geschätzt. Die inhaltlichen Schwerpunkte der Module sind: Emotionen und Gedanken sowie kognitive Verzerrungen, Distanz zu automatischen Gedanken schaffen, Stressabbau durch Relaxation und Identifikation von Stressoren, sowie soziale Beziehungen und Problemlösefähigkeiten. Die Module bestehen aus Informationstexten, Animationen sowie interaktiven Übungen und Quizen. Der therapeutische Ansatz des Kurses basiert auf Techniken der kognitiven Verhaltenstherapie. Der Kurs ist unbegleitet. Moodgym wurde in mehreren randomisiert kontrollierten Studien sowie in einer Metaanalyse, die elf Studien einschloss, untersucht (Twomey et al. 2017). Eine Studie überprüfte explizit die Wirksamkeit der deutschen Version von moodgym (31). In die vorliegende Metaanalyse gingen insgesamt zehn dieser Studien ein.

| <b>Moodgym<sup>6</sup></b>                        |                                                                                                                                                                                                |
|---------------------------------------------------|------------------------------------------------------------------------------------------------------------------------------------------------------------------------------------------------|
| Indikation                                        | Depressive Störung                                                                                                                                                                             |
| Therapieprinzip                                   | KVT, v.a. kognitive Techniken aber auch andere Themen wie Aktivierung und Beziehungen                                                                                                          |
| Wirkstärke im Vergleich zur Kontrollgruppe        | RCT der deutschen Version: d = 0,36 (ITT) (647 Teilnehmende) (Löbner et al., 2018); Metaanalyse der englischen Version: g = 0,36 (11 Studien mit 5745 Teilnehmenden) (Twomey & O'Reilly, 2017) |
| Möglichkeit der Integration in die f2f-Behandlung | 1: Intervention kann unabhängig von f2f-Behandlung bearbeitet oder in f2f-Behandlung integriert werden                                                                                         |
| PZN                                               | –                                                                                                                                                                                              |
| Sprachen                                          | Deutsch, Englisch                                                                                                                                                                              |
| Plattformen                                       | Webanwendung                                                                                                                                                                                   |

<sup>6</sup> Freier Zugang für alle: <https://moodgym.de/>

### 1.3.5 Novego: Depressionen bewältigen

Das Programm Novego: Depressionen bewältigen der IVPNetworks GmbH wurde am 10. Oktober 2021 vorläufig in das DiGA-Verzeichnis aufgenommen. Es handelt sich um eine deutschsprachige Web-Anwendung, die bei Vorliegen einer leichten bis mittelgradigen depressiven Störung (ICD-10: F32.0, F32.1, F33.0, F33.1) sowie Dysthymie (F34.1) indiziert ist und ab einem Alter von 18 Jahren verordnet werden kann. Die Inhalte des Programms basieren auf den Methoden der kognitiven Verhaltenstherapie, die durch Ansätze aus der systemischen Therapie und Achtsamkeitsverfahren ergänzt werden. Insgesamt besteht der Kurs aus zwölf Modulen, welche automatisch basierend auf einem Pre-Assessment aus einem Pool von 17 Modulen ausgewählt werden. Die empfohlene Bearbeitungszeit beträgt zwölf Wochen. Die Module bestehen aus Informationstexten und einer Videomoderation, welche durch das Programm führt und interaktive Aufgaben, Arbeitsblätter und Animationen zeigt. Die Bearbeitungszeit pro Modul wird auf 30 bis 60 Minuten geschätzt. Inhaltlich werden unter anderem Themen wie Psychoedukation, Ressourcen, Abwärtsspiralen, kognitive Umstrukturierung, Entspannung und Achtsamkeit, Aktivitätsaufbau, soziale Beziehungen und

Rückfallprävention behandelt. Die Nutzer haben die Möglichkeit mit einer Nachrichtenfunktion Fragen an Psychologen zu Wochenübungen oder der persönlichen Situation zu stellen. Die Wirksamkeit von Novego wurde bisher in drei randomisiert kontrollierten Studien an unterschiedlichen Patient\*innen-Gruppen untersucht. Alle drei Studien wurden in die vorliegende Metaanalyse aufgenommen.

| <b><u>Novego: Depressionen bewältigen</u></b> <sup>1</sup> |                                                                                                                                                                                                                           |
|------------------------------------------------------------|---------------------------------------------------------------------------------------------------------------------------------------------------------------------------------------------------------------------------|
| Indikation                                                 | Depressive Störung (leicht bis mittelgradig)                                                                                                                                                                              |
| Therapieprinzip                                            | KVT, individuell auf die persönliche Lebenssituation abgestimmt                                                                                                                                                           |
| Form der Begleitung                                        | Psycholog*innen-Team kann einmal pro Woche für Fragen und Feedback kontaktiert werden; 24h-Krisenhotline für akute Krisen                                                                                                 |
| Wirkstärke im Vergleich zur Kontrollgruppe                 | RCT: d = 0,55 (ITT) (180 Teilnehmende) (Beiwinkel et al., 2017); weitere RCTs zur Wirksamkeit bei Schizophrenie (Moritz et al., 2016) und Schmerzpatient*innen mit depressiven Symptomen (Miegel et al., 2019) liegen vor |
| Möglichkeit der Integration in die f2f-Behandlung          | 0: DiGA kann unabhängig von der f2f-Behandlung bearbeitet werden                                                                                                                                                          |
| PZN                                                        | 17865862                                                                                                                                                                                                                  |
| Sprachen                                                   | Deutsch                                                                                                                                                                                                                   |
| Plattformen                                                | Webanwendung                                                                                                                                                                                                              |

<sup>1</sup> Kontakt: [info@novego.de](mailto:info@novego.de)

### 1.3.6 Selfapys Online-Kurs bei Depressionen

Die von der Selfapy GmbH entwickelte Intervention *Selfapys Online-Kurs bei Depressionen* wurde nach einer Erprobungsphase am 11. April 2022 dauerhaft in das DiGA-Verzeichnis aufgenommen. Der Kurs ist indiziert bei Personen ab 18 Jahren, die an einer mittelgradigen depressiven Störung (ICD-10: F32.1, F33.1) erkrankt sind. Die Intervention basiert auf den Techniken der kognitiven Verhaltenstherapie und beinhaltet die Themenbereiche Psychoedukation, Verhaltensaktivierung, kognitive Umstrukturierung, Problemlösung, Selbstwert und Selbstwirksamkeit, soziale Umwelt, Ressourcen, Achtsamkeit und Rückfallprävention. Die teilweise anhand der Angaben der nutzenden Person individuell angepassten Inhalte werden im Rahmen von zwölf, sequenziell freigeschalteten Lektionen mittels Texten, Audio- und Videoclips sowie interaktiven Übungen vermittelt. Der Hersteller gibt für eine einzelne Lektion eine Bearbeitungszeit von 10 bis 60 Minuten an. Die Nutzung des Kurses kann durch eine/n Psycholog\*in überwacht werden, welche/r per Nachrichtenfunktion Fragen zur sachgemäßen Anwendung beantworten kann. Die Wirksamkeit des Online-Kurses bei Depressionen von Selfapy wurde bisher in nur einer randomisiert kontrollierten Studie untersucht, welche in die vorliegende Metaanalyse aufgenommen wurde.



| <b>Selfpays Online-Kurs bei Depressionen<sup>2</sup></b> |                                                                                                                                                                                 |
|----------------------------------------------------------|---------------------------------------------------------------------------------------------------------------------------------------------------------------------------------|
| Indikation                                               | Depressive Störung (leicht bis mittelgradig)                                                                                                                                    |
| Therapieprinzip                                          | KVT, u.a. kognitive Umstrukturierung und Verhaltensaktivierung                                                                                                                  |
| Form der Begleitung                                      | Psycholog*in steht über Nachrichtenfunktion bei Fragen zur Verfügung (Psycholog*in überwacht zudem zur Wahrung der Patient*innen-Sicherheit im Hintergrund den Kursfortschritt) |
| Wirkstärke im Vergleich zur Kontrollgruppe               | RCT: mit Begleitung: d = 1,63; ohne Begleitung: d = 1,47 (ITT) (401 Teilnehmende) (Krämer et al., 2022)                                                                         |
| Möglichkeit der Integration in die f2f-Behandlung        | 0: DiGA kann unabhängig von der f2f-Behandlung bearbeitet werden                                                                                                                |
| PZN                                                      | 16954730                                                                                                                                                                        |
| Sprachen                                                 | Deutsch                                                                                                                                                                         |
| Plattformen                                              | Webanwendung                                                                                                                                                                    |

<sup>2</sup>Anforderung von Testzugang: <https://www.selfapy.com/fuer-aerzte>

*Anmerkungen: Abkürzungsverzeichnis und Legende*

|                |                                                                                             |
|----------------|---------------------------------------------------------------------------------------------|
| ACT            | Akzeptanz- und Commitment-Therapie                                                          |
| BfArM          | Bundesinstitut für Arzneimittel und Medizinprodukte                                         |
| DiGA           | Digitale Gesundheitsanwendung                                                               |
| DGPPN          | Deutsche Gesellschaft für Psychiatrie und Psychotherapie, Psychosomatik und Nervenheilkunde |
| DGP            | Deutsche Gesellschaft für Psychiatrie                                                       |
| f2f-Behandlung | Face-to-Face-Behandlung (im persönlichen Kontakt)                                           |
| GAS            | Generalisierte Angststörung                                                                 |
| ITT            | Intention to Treat                                                                          |
| KVT            | Kognitive Verhaltenstherapie                                                                |
| NNT            | Number Needed to Treat                                                                      |
| PMR            | Progressive Muskelrelaxation                                                                |
| PP             | Per Protocol                                                                                |
| PRISMA         | Preferred Reporting Items for Systematic Reviews and Meta-Analyses                          |
| PZN            | Pharmazentralnummer                                                                         |
| RCT            | randomisiert kontrollierte Studie                                                           |

### *Möglichkeit der Integration in die Face-to-Face-Behandlung (f2f-Behandlung)*

- 0: DiGA kann unabhängig von der f2f-Behandlung bearbeitet werden
- 1: DiGA kann unabhängig von f2f-Behandlung bearbeitet oder in f2f-Behandlung integriert werden; die DiGA bietet beispielsweise die Möglichkeit einen Report der gesammelten Daten zu erstellen, der an den/die Psychotherapeut\*in oder Ärzt\*in geschickt werden und gemeinsam besprochen werden kann
- 2: DiGA kann unabhängig von f2f-Behandlung bearbeitet werden, Integration in f2f-Behandlung empfehlenswert; es wird beispielsweise empfohlen, dass die Behandler\*innen gemeinsam mit den Patient\*innen passende Übungen aus dem Übungs-Pool der DiGA herausuchen oder diese nachbesprechen
- 3: DiGA kann nicht unabhängig von f2f-Behandlung verwendet werden, Integration in f2f-Behandlung notwendig; d.h. Patient\*innen können die DiGA nicht ohne eine parallele psychotherapeutische oder ärztliche Begleitung anwenden
